# Supplementary material
Source: PubMed Central journal article supplement (PMC151224)
Supplement: plntcell_14_10_2383__1.pdf [file plntcell_14_10_2383__1.pdf]

**Supplemental Table 1.** Summary of the Overlaps in the Differentially Regulated Genes by the *cop1* Mutations and the White Light

**Section A:** Number and percentage of white light up-regulated genes overlap with those regulated by the three *cop1* mutations in darkness. In this study, 1065 genes were up-regulated in white light in wild type with 2-fold cut-off. Three cut-off values for the differential expression ratios were used for the *cop1* mutations.

(i) Similarly regulated (percentage in bracket)

|                       | <u><i>cop1-1</i></u> | <u><i>cop1-4</i></u> | <u><i>cop1-6</i></u> | <u>N-282</u> |
|-----------------------|----------------------|----------------------|----------------------|--------------|
| With 2-fold cut-off   | 566 (53%)            | 611 (57.4%)          | 557 (52.3%)          | 512 (48.1%)  |
| With 1.5-fold cut-off | 807 (75.8%)          | 819 (76.9%)          | 773 (72.6%)          | 758 (71.2%)  |
| With 1.2-fold cut-off | 936 (87.9%)          | 938 (88.1%)          | 915 (85.9%)          | 906 (85.1%)  |

(ii) Oppositely regulated (percentage in bracket)

|                       | <u><i>cop1-1</i></u> | <u><i>cop1-4</i></u> | <u><i>cop1-6</i></u> | <u>N-282</u> |
|-----------------------|----------------------|----------------------|----------------------|--------------|
| With 2-fold cut-off   | 8 (0.75%)            | 10 (0.94%)           | 4 (0.38%)            | 4 (0.38%)    |
| With 1.5-fold cut-off | 19 (1.78%)           | 17 (1.60%)           | 16 (1.50%)           | 12 (1.13%)   |
| With 1.2-fold cut-off | 31 (2.9%)            | 39 (3.7%)            | 32 (3.00%)           | 31 (2.9%)    |

**Section B:** Number and percentage of white light down-regulated genes overlap with those regulated by the three *cop1* mutations in darkness. In this study, 774 genes were up-regulated in white light in wild type with 2-fold cut-off. Three cut-off values for the differential expression ratios were used for the *cop1* mutations.

(iii) Similarly regulated (percentage in bracket)

|                       | <u><i>cop1-1</i></u> | <u><i>cop1-4</i></u> | <u><i>cop1-6</i></u> | <u>N-282</u> |
|-----------------------|----------------------|----------------------|----------------------|--------------|
| With 2-fold cut-off   | 432 ((55.8%)         | 368 (47.5%)          | 278 (40%)            | 268 (34.6%)  |
| With 1.5-fold cut-off | 603 (77.9%)          | 633 (81.8%)          | 515 (66.5%)          | 505 (65.2%)  |
| With 1.2-fold cut-off | 691 (89.3%)          | 720 (93.0%)          | 654 (84.5)           | 644 (83.2%)  |

(iv) Oppositely regulated (percentage in bracket)

|                       | <u><i>cop1-1</i></u> | <u><i>cop1-4</i></u> | <u><i>cop1-6</i></u> | <u>N-282</u> |
|-----------------------|----------------------|----------------------|----------------------|--------------|
| With 2-fold cut-off   | 10 (1.29%)           | 2 (0.26%)            | 14 (1.81%)           | 7 (0.90%)    |
| With 1.5-fold cut-off | 18 (2.33%)           | 6 (0.78%)            | 25 (3.33%)           | 17 (2.20%)   |
| With 1.2-fold cut-off | 28 (3.61%)           | 16 (1.29%)           | 44 (5.68%)           | 29 (3.75%)   |

**Section C:** Number and percentage of white light total (up and down) regulated genes overlap with those regulated by the three *cop1* mutations in darkness. Together, 1839 genes were up or down-regulated in white light with 2-fold cut-off. Three cut-off values for the differential expression ratios were used for the *cop1* mutations.

(v) Similarly regulated (percentage in bracket)

|                       | <u><i>cop1-1</i></u> | <u><i>cop1-4</i></u> | <u><i>cop1-6</i></u> | <u>N-282</u> |
|-----------------------|----------------------|----------------------|----------------------|--------------|
| With 2-fold cut-off   | 998 (54.3%)          | 979 (53.2%)          | 835 (45.4%)          | 780 (42.4%)  |
| With 1.5-fold cut-off | 1410 (76.7%)         | 1452 (79.0%)         | 1288 (70.0%)         | 1263 (68.7%) |

With 1.2-fold cut-off 1627 (88.5%) 1658 (90.2%) 1569 (85.3%) 1550 (84.3%)

(vi) Oppositely regulated (percentage in bracket)

|                     | <u><i>cop1-1</i></u> | <u><i>cop1-4</i></u> | <u><i>cop1-6</i></u> | <u>N-282</u> |
|---------------------|----------------------|----------------------|----------------------|--------------|
| With 2-fold cut-off | 18 (0.98%)           | 12 (0.65%)           | 18 (0.98%)           | 11 (0.60%)   |
| With 2-fold cut-off | 37 (2.0%)            | 23 (1.25%)           | 41 (2.23%)           | 29 (1.58%)   |
| With 2-fold cut-off | 59 (3.21%)           | 55 (2.99%)           | 76 (4.13%)           | 60 (3.26%)   |

**Section D:** Number and percentage of differentially regulated genes that overlap among the three *cop1* mutations in darkness. The 2-fold cut-off was used to select those genes regulated by each of the three *cop1* mutations.

(vii) Similarly regulated (percentage in bracket)

|               | <u><i>cop1-1</i></u> | <u><i>cop1-4</i></u> | <u><i>cop1-6</i></u> | <u>N-282</u> |
|---------------|----------------------|----------------------|----------------------|--------------|
| <i>cop1-1</i> | 1321 (100%)          |                      |                      |              |
| <i>cop1-4</i> | 1176 (70.7%)         | 1176 (100%)          |                      |              |
| <i>cop1-6</i> | 1162 (62.5%)         | 709 (61.0%)          | 1162 (100%)          |              |
| N282          | 673 (69.1%)          | 639 (65.7%)          | 666 (85.3%)          | 973 (68.4%)  |

(viii) Oppositely regulated (percentage in bracket)

|               | <u><i>cop1-1</i></u> | <u><i>cop1-4</i></u> | <u><i>cop1-6</i></u> | <u>N-282</u> |
|---------------|----------------------|----------------------|----------------------|--------------|
| <i>cop1-1</i> | 0 (0%)               |                      |                      |              |
| <i>cop1-4</i> | 8 (0.68%)            | 0 (0%)               |                      |              |
| <i>cop1-6</i> | 13 (1.1%)            | 13 (1.1%)            | 0 (0%)               |              |
| N282          | 13 (1.34%)           | 18 (1.85%)           | 2 (0.21%)            | 0 (0%)       |

**Section E:** Number and percentage of differentially regulated genes by the three different qualities and white light in wild type. The 2-fold cut-off was used to select those genes regulated by each of the light quality.

(ix) Similarly regulated (percentage in bracket)

|               | <u>White light</u> | <u>Blue light</u> | <u>Red light</u> | <u>Fare red light</u> |
|---------------|--------------------|-------------------|------------------|-----------------------|
| White light   | 1839 (100%)        |                   |                  |                       |
| Blue light    | 713 (78.2%)        | 911 (100%)        |                  |                       |
| Red light     | 452 (67.4%)        | 467 (69.6%)       | 671 (100%)       |                       |
| Far red light | 793 (73.3%)        | 498 (46.0%)       | 335 (31.0%)      | 1082 (100%)           |

(x) Oppositely regulated (percentage in bracket)

|               | <u>White light</u> | <u>Blue light</u> | <u>Red light</u> | <u>Fare red light</u> |
|---------------|--------------------|-------------------|------------------|-----------------------|
| White light   | 0 (0%)             |                   |                  |                       |
| Blue light    | 23 (2.52%)         | 0 (0%)            |                  |                       |
| Red light     | 26 (3.87%)         | 16 (3.38%)        | 0 (0%)           |                       |
| Far red light | 20 (1.85%)         | 15 (1.39%)        | 16 (1.48%)       | 0 (0%)                |
